# Supplementary material
Source: publisher site journal article supplement (https://www.degruyterbrill.com/publication/isbn/978-3-486-71735-8/downloadAsset/9783486717358_Beispielprogramme.zip)
Supplement: Supplementary file 2 [file 9783486717358_Beispielprogramme.zip]

## Hinweise für die Leser

Die neuen Programme (Skripte) und neuen Simulink-Modelle wurden mit der MATLAB-Version 2011 b geschrieben. Die Programme aus der vorherigen Auflage wurden mit dieser Version ebenfalls getestet. Bei den Skripten sind keine Probleme aufgetreten. Die alten Simulink-Modelle wurden auch in der ursprünglichen Form (für die älteren Versionen) konvertiert. Man erkennt leicht die Modelle für die neue und alte Version aus dem Namen:

|                        |                |
|------------------------|----------------|
| adaptiv1.mdl           | (neue Version) |
| adaptiv1.mdl.r13 (sp1) | (alte Version) |

Die Programme (Skripte und Simulink-Modelle) sind kapitelweise sortiert. Grundsätzlich werden die Modelle aus MATLAB-Skripte aufgerufen. Diese enthalten am Anfang die Initialisierungen und Parametrierungen der Modelle, danach folgt der Aufruf der Simulation und weiter werden die Ergebnisse der Simulation im Skript bearbeitet und graphisch dargestellt.

Der Name des Skriptes und des entsprechenden Modells sind sehr ähnlich gewählt, so dass man leicht die Zugehörigkeit erkennt, wie z.B. gleit\_komma\_3.m (für das Skript) und gleit\_komma3.mdl (für das Modell).

Die Skripte und Modelle sind relativ einfach gestaltet, wegen des Volumens im Buch und auch damit sie leicht verständlich sind. Sie sind nicht auf Effizienz getrimmt. Wegen der Verständlichkeit werden vielmals z.B. for-Schleifen statt Matrix-Operationen eingesetzt.

Bei MATLAB-Versionen, die Schwierigkeiten mit den Modellen haben, kann man diese mit der vorhandenen Version neu aufbauen. Es werden typische Blöcke eingesetzt, die in den älteren Versionen auch verfügbar sind. In der neuen Version sind sie nur in anderen Toolboxes enthalten.

Karlsruhe, 30.03.2012

Autoren
