# Supplementary material
Source: publisher site journal article supplement (https://www.degruyterbrill.com/publication/isbn/978-3-486-71735-8/downloadAsset/9783486717358_Beispielprogramme.zip)

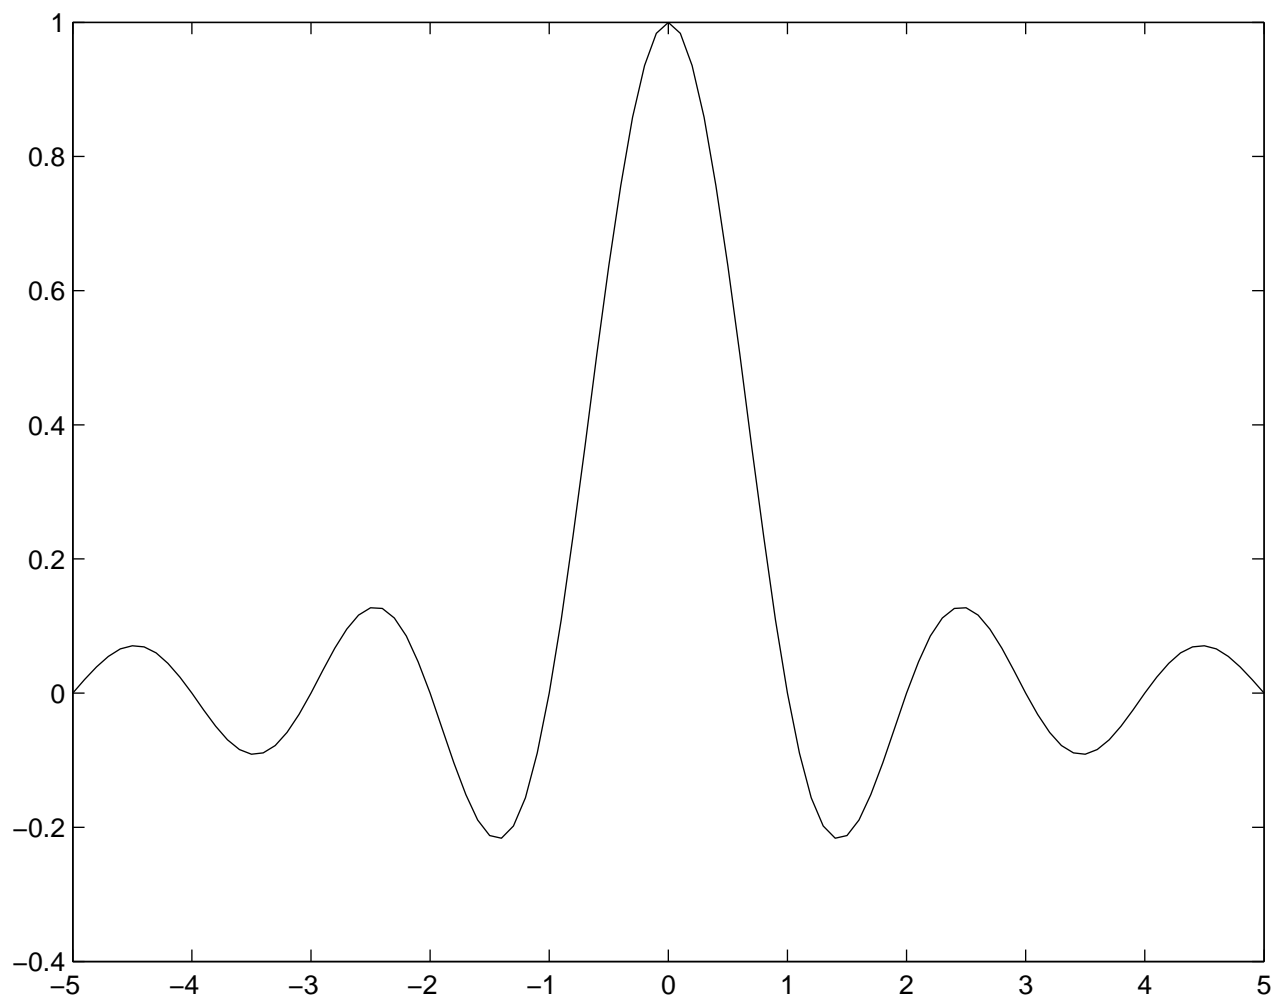

Supplement: Supplementary file 1 [file 9783486717358_Beispielprogramme.zip]
